# Supplementary material for: Exploration of potential-limited protocols to prevent inefficiencies in Li–O2 batteries during charge
Source: Royal Society of Chemistry journal article supplement (doi:10.1039/d4cc05801a), 2025-01-01
Supplement: d4cc05801a1.pdf [file d4cc05801a1.pdf]

Supporting information

**Exploration of potential-limited protocols to prevent inefficiencies in Li-O<sub>2</sub>  
batteries during charge**

Zoé Lacour<sup>a,b</sup>, Youngjin Ham<sup>a,e</sup>, Laurence Brazel<sup>a</sup>, Clare P. Grey<sup>\*a,c</sup> and Israel Temprano<sup>\*a,c,d</sup>

<sup>a</sup>*Yusuf Hamied Department of Chemistry, University of Cambridge, Cambridge CB21EW, U.K.*

<sup>b</sup>*Department of Chemistry, University of Oxford, Oxford OX13TA, U.K.*

<sup>c</sup>*The Faraday Institution, Didcot OX110RA, U.K.*

<sup>d</sup>*CICA - Interdisciplinary Center for Chemistry and Biology, University of A Coruña, 15071, A  
Coruña, Spain.*

<sup>e</sup>*Cambridge Graphene Centre, University of Cambridge, Cambridge CB30FA.*

## **Experimental details**

### **Materials and Reagents**

Lithium metal, lithium bis-trifluoromethane sulfonimide (LiTFSI, Sigma Aldrich,  $\geq 99.0\%$  pure) powder, 1,2-dimethoxyethane (DME, Honeywell, inhibitor-free,  $\geq 99\%$  pure), lithium iodide (LiI, Acros Organics,  $\geq 99\%$  pure, anhydrous), borosilicate glass fibre separators (Whatman) and Super P GDL carbon electrodes (Sigracet 39BB) were purchased from commercial suppliers. All materials were stored in a glovebox ( $<1$  ppm  $\text{H}_2\text{O}$ ,  $<0.1$  ppm  $\text{O}_2$ ) under an inert Ar atmosphere when not in use.

### **Preparation of electrolyte**

1,2-dimethoxyethane (DME) was purified in contact with metallic sodium overnight, distilled immediately afterwards and stored in contact with 3 Å molecular sieves in the same glovebox as the electrodes. Prior to use, lithium bis-trifluoromethane sulfonimide (LiTFSI) powder was dried at  $150\text{ }^\circ\text{C}$  under vacuum for 24 hours, and lithium iodide (LiI) was dried at  $200\text{ }^\circ\text{C}$  under vacuum for 24 hours. The baseline electrolyte was prepared with 1 M LiTFSI in DME, then 0.1 M LiI was added to prepare the redox mediator-containing electrolyte.

### **Cell Assembly**

The Li- $\text{O}_2$  cells were assembled with a Swagelok setup sealed in a glass chamber, which is then filled with  $\text{O}_2$  gas, and the electrodes were connected to the potentiostat via external cables. Prior to use, glass fibre separators were rinsed three times in ethanol and acetone to remove calcium carbonate and other impurities. Super P GDL carbon electrodes and glass fibre separators were dried under vacuum at  $120\text{ }^\circ\text{C}$  prior to use. Inside the Swagelok cell, a 5.5 mm diameter Li metal disc was placed, followed by a glass fibre separator onto which 150  $\mu\text{L}$  of the electrolyte was then pipetted, followed by a 9.525 mm diameter Super P GDL carbon electrode. To facilitate the diffusion of  $\text{O}_2$ , a stainless steel mesh was placed on top of the cathode to act as the current collector. Then another positive plunger with a through-hole inside was pressed from the other side of the Swagelok cell. This top plunger was connected to a Swagelok Quick-Connect valve. For testing, the cell was connected to a

chamber of volume  $\sim 100 \text{ cm}^3$  filled with  $\text{O}_2$  at 1.5 bar. The cell was rested for 8 hours prior to cycling to ensure complete electrode wetting and saturation of the electrolyte with  $\text{O}_2$ .

### X-ray diffraction (XRD)

XRD was performed on a Panalytical X'pert Pro diffractometer, operated at 40 kV and 40 mA with a Cu source. Reference XRD data was reconstructed from .cif files found on the Crystallography Open Database (COD).  $\text{Li}_2\text{O}_2$  COD ID: 2100227, ref [1].  $\text{LiOH}\cdot\text{H}_2\text{O}$  COD ID: 2106174, ref [2].  $\text{LiOH}$  COD ID: 9008958, ref [3].

### Scanning electron microscopy (SEM)

SEM was performed at 5 kV under secondary electron mode with Tescan Mira 3, which is equipped with a FEG Schottky emitter.

### Additional Characterisation

#### SEM

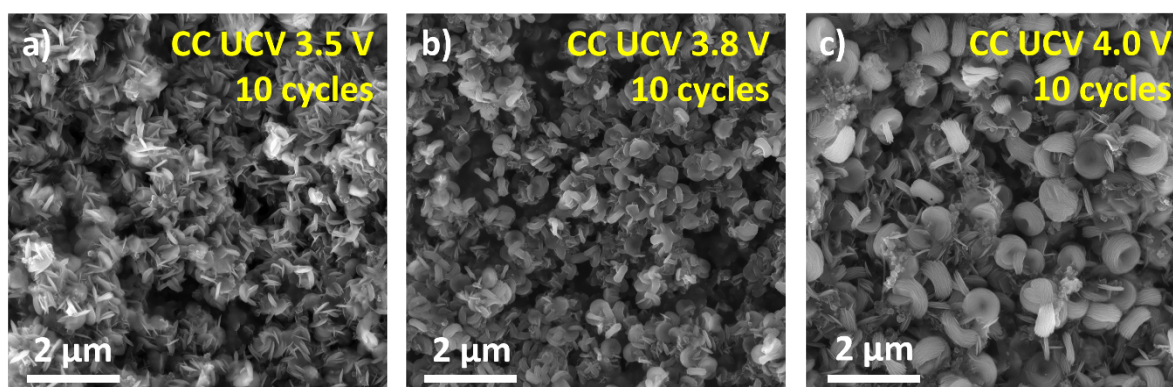

**Figure S1** SEM images of electrodes from  $\text{Li-O}_2$  cells after 10 cycles cycled with a CC protocol at varying upper-cut-off voltages (UCVs); **a)** 3.5 V, **b)** 3.8 V and **c)** 4.0 V.

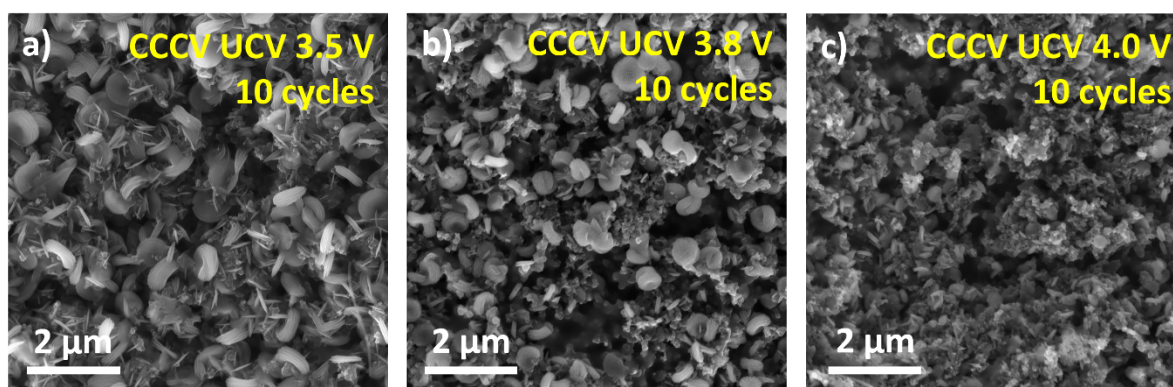

**Figure S2** SEM images of electrodes from  $\text{Li-O}_2$  cells after 10 cycles cycled with a CCCV protocol at varying upper-cut-off voltages (UCVs); **a)** 3.5 V, **b)** 3.8 V and **c)** 4.0 V.

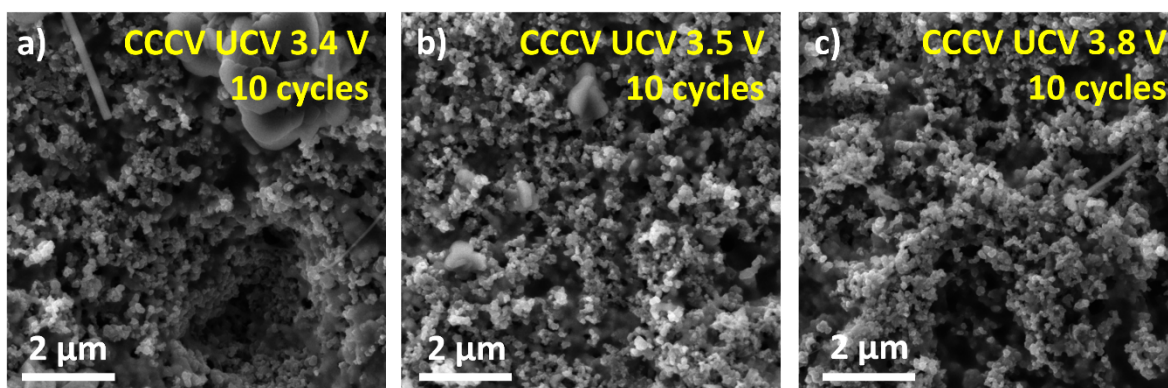

**Figure S3** SEM images of electrodes from Li-O<sub>2</sub> cells containing LiI in the electrolyte after 10 cycles cycled with a CCCV protocol at varying upper-cut-off voltages (UCVs); **a)** 3.4 V, **b)** 3.5 V and **c)** 3.8 V.

### Additional Cycling Data

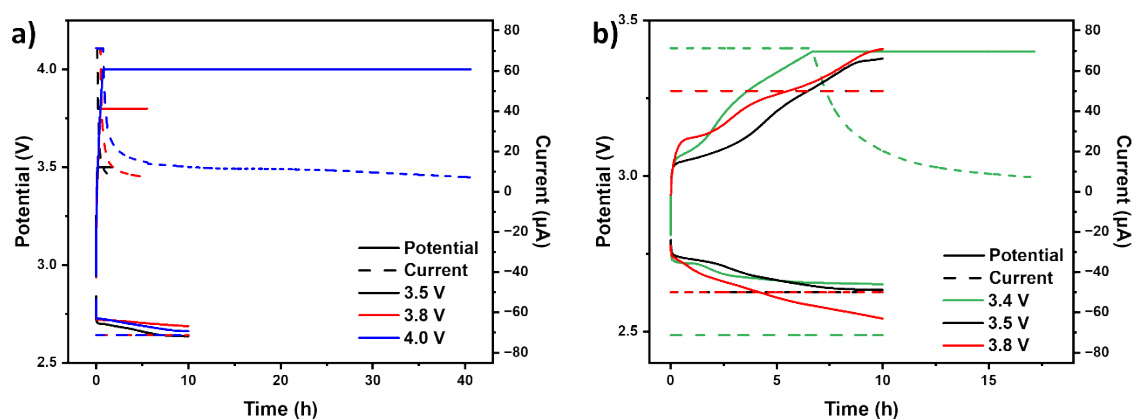

**Figure S4** Potential (solid line) and current (dashed line) vs time for cells cycled with a CCCV protocol at a range of UCVs; 3.4 V (green), 3.5 V (black), 3.8 V (red) and 4.0 V (blue). **a)** Cells without LiI and **b)** containing LiI as a redox mediator in the electrolyte.

### References

- [1] L.G. Cota, P. de La Mora, *Acta Crystallographica Section B*, **2005**, *61*, 133-136
- [2] L.W. Alcock, *Acta Crystallographica B (24,1968-38,1982)*, **1971**, *27*, 1682-1683
- [3] R. W. G. Wyckoff, *Crystal Structures*, **1963**, *1*, 85-237
